# Supplementary material for: Cross-Cultural adaptation and psychometric evaluation of the Chinese version of the artificial Intelligence attitude scale for nurses
Source: Research Square preprint supplement (doi:10.21203/rs.3.rs-8311732/v1), 2026-01-09
Supplement: Supplementary file 1 [file 7d478147410c0ca68ba595f3.docx]

| **Table S1:** Results of Expert Consultation | | | | | | | | | |
| --- | --- | --- | --- | --- | --- | --- | --- | --- | --- |
| Expert | Theoretical Knowledge | Practical Experience | Reference to Domestic and International Materials | Personal Intuition | Familiarity Level | Ca | Cs | Cr | Kendall's Coefficient of Agreement |
| 1 | 0.300 | 0.500 | 0.100 | 0.100 | 1.000 | 0.950 | 0.900 | 0.925 | 0.481 |
| 2 | 0.300 | 0.500 | 0.100 | 0.100 | 0.800 |
| 3 | 0.200 | 0.500 | 0.100 | 0.100 | 1.000 |
| 4 | 0.300 | 0.500 | 0.100 | 0.100 | 0.800 |
| 5 | 0.300 | 0.500 | 0.100 | 0.100 | 0.800 |
| 6 | 0.300 | 0.500 | 0.100 | 0.100 | 1.000 |
| 7 | 0.100 | 0.500 | 0.100 | 0.100 | 0.800 |
| 8 | 0.300 | 0.500 | 0.100 | 0.100 | 1.000 |

| **Table S2** Content Validity | | | | | | | |
| --- | --- | --- | --- | --- | --- | --- | --- |
|  | Mean | Standard Deviation | Minimum | Maximum | Coefficient of Variation | I-CVI | S-CVI |
| A1 | 4.000 | 0.000 | 4.000 | 4.000 | 0.000 | 1.000 | 0.941 |
| A2 | 4.000 | 0.000 | 4.000 | 4.000 | 0.000 | 1.000 |
| A3 | 2.875 | 0.354 | 2.000 | 3.000 | 0.123 | 0.875 |
| A4 | 4.000 | 0.000 | 4.000 | 4.000 | 0.000 | 1.000 |
| A5 | 4.000 | 0.000 | 4.000 | 4.000 | 0.000 | 1.000 |
| A6 | 2.875 | 0.354 | 2.000 | 3.000 | 0.123 | 0.875 |
| A7 | 4.000 | 0.000 | 4.000 | 4.000 | 0.000 | 1.000 |
| A8 | 4.000 | 0.000 | 4.000 | 4.000 | 0.000 | 1.000 |
| A9 | 4.000 | 0.000 | 4.000 | 4.000 | 0.000 | 1.000 |
| A10 | 2.875 | 0.354 | 2.000 | 3.000 | 0.123 | 0.875 |
| A11 | 4.000 | 0.000 | 4.000 | 4.000 | 0.000 | 1.000 |
| A12 | 4.000 | 0.000 | 4.000 | 4.000 | 0.000 | 1.000 |
| A13 | 2.875 | 0.354 | 2.000 | 3.000 | 0.123 | 0.875 |
| A14 | 4.000 | 0.000 | 4.000 | 4.000 | 0.000 | 1.000 |
| A15 | 2.875 | 0.354 | 2.000 | 3.000 | 0.123 | 0.875 |
| A16 | 3.500 | 0.535 | 3.000 | 4.000 | 0.153 | 1.000 |
| A17 | 3.375 | 0.518 | 3.000 | 4.000 | 0.153 | 1.000 |
| A18 | 3.250 | 0.707 | 2.000 | 4.000 | 0.218 | 0.875 |
| A19 | 3.375 | 0.518 | 3.000 | 4.000 | 0.153 | 1.000 |
| A20 | 3.375 | 0.744 | 2.000 | 4.000 | 0.220 | 0.875 |
| A21 | 3.375 | 0.744 | 2.000 | 4.000 | 0.220 | 0.875 |
| A22 | 3.500 | 0.535 | 3.000 | 4.000 | 0.153 | 1.000 |
| A23 | 3.375 | 0.744 | 2.000 | 4.000 | 0.220 | 0.875 |
| A24 | 3.375 | 0.518 | 3.000 | 4.000 | 0.153 | 1.000 |
| A25 | 3.125 | 0.641 | 2.000 | 4.000 | 0.205 | 0.875 |
| A26 | 3.375 | 0.744 | 2.000 | 4.000 | 0.220 | 0.875 |
| A27 | 3.250 | 0.707 | 2.000 | 4.000 | 0.218 | 0.875 |
| A28 | 3.625 | 0.518 | 3.000 | 4.000 | 0.143 | 1.000 |
| A29 | 3.375 | 0.744 | 2.000 | 4.000 | 0.220 | 0.875 |
| A30 | 3.500 | 0.535 | 3.000 | 4.000 | 0.153 | 1.000 |
| A31 | 3.250 | 0.707 | 2.000 | 4.000 | 0.218 | 0.875 |
| A32 | 3.250 | 0.707 | 2.000 | 4.000 | 0.218 | 0.875 |

| **Table S3** KMO and Bartlett's Test(N=220) | | |
| --- | --- | --- |
| KMO Sampling Adequacy Measure |  | 0.925 |
| Bartlett's Sphericity Test | Approximate chi-square | 6740.397 |
|  | degree of freedom | 496 |
|  | P | 0.000 |
